# Supplementary figures and images for: Spatial signals link exit from mitosis to spindle position
Source: eLife journal article supplement (doi:10.7554/elife.14036), 2016-05-11

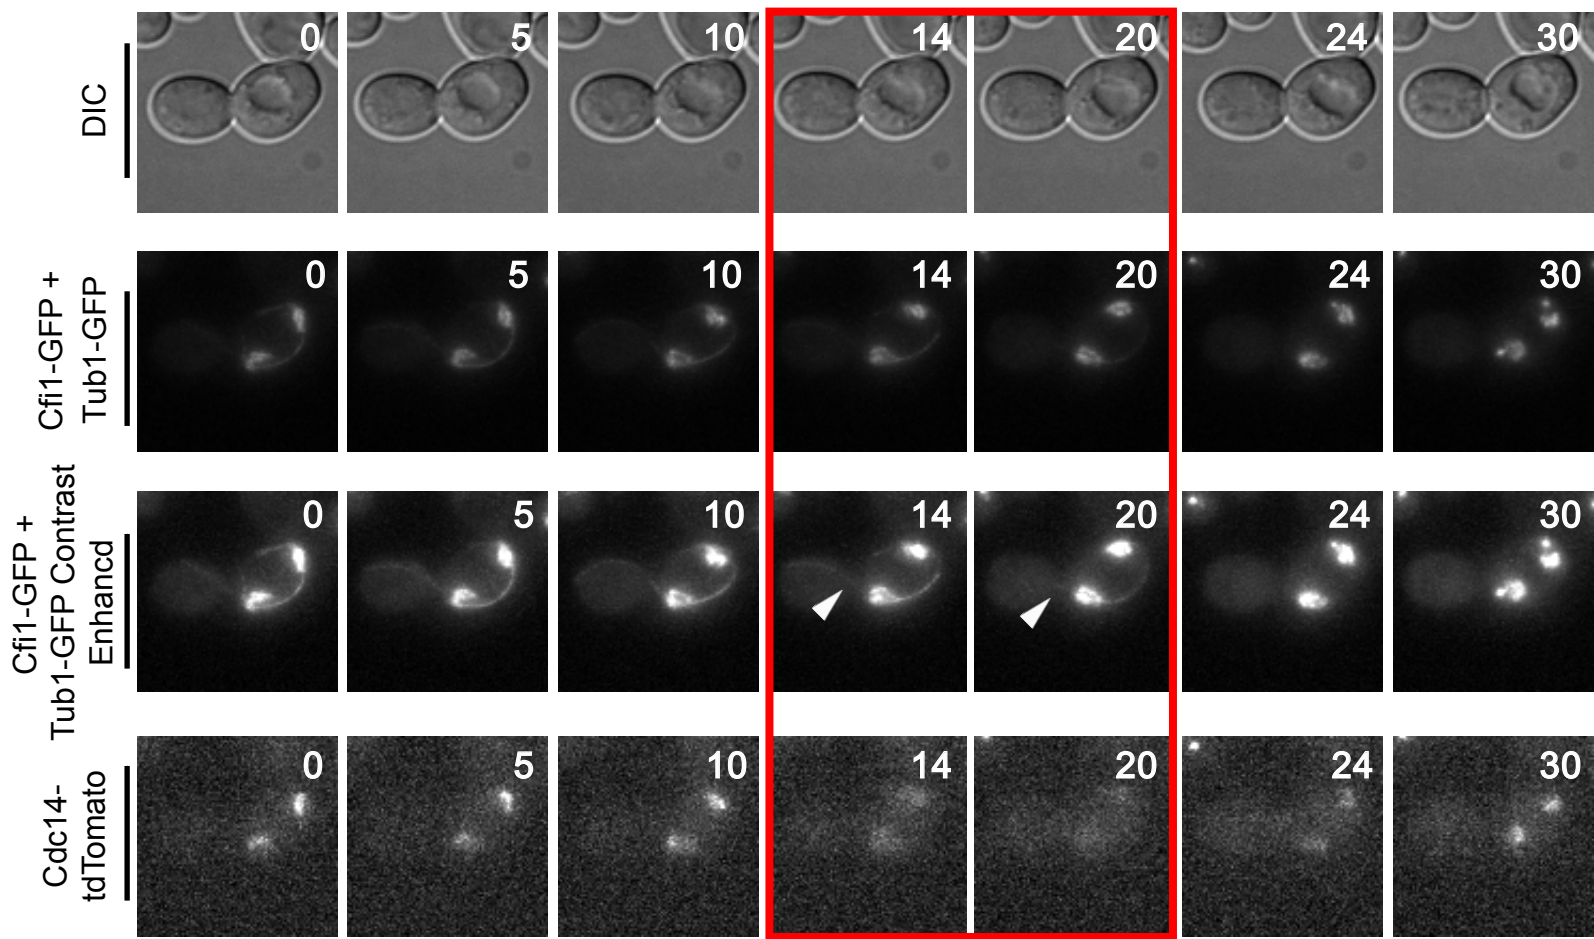

Figure 4-figure supplement 3

Supplement: supp [file elife-14036-supp-v1.zip]

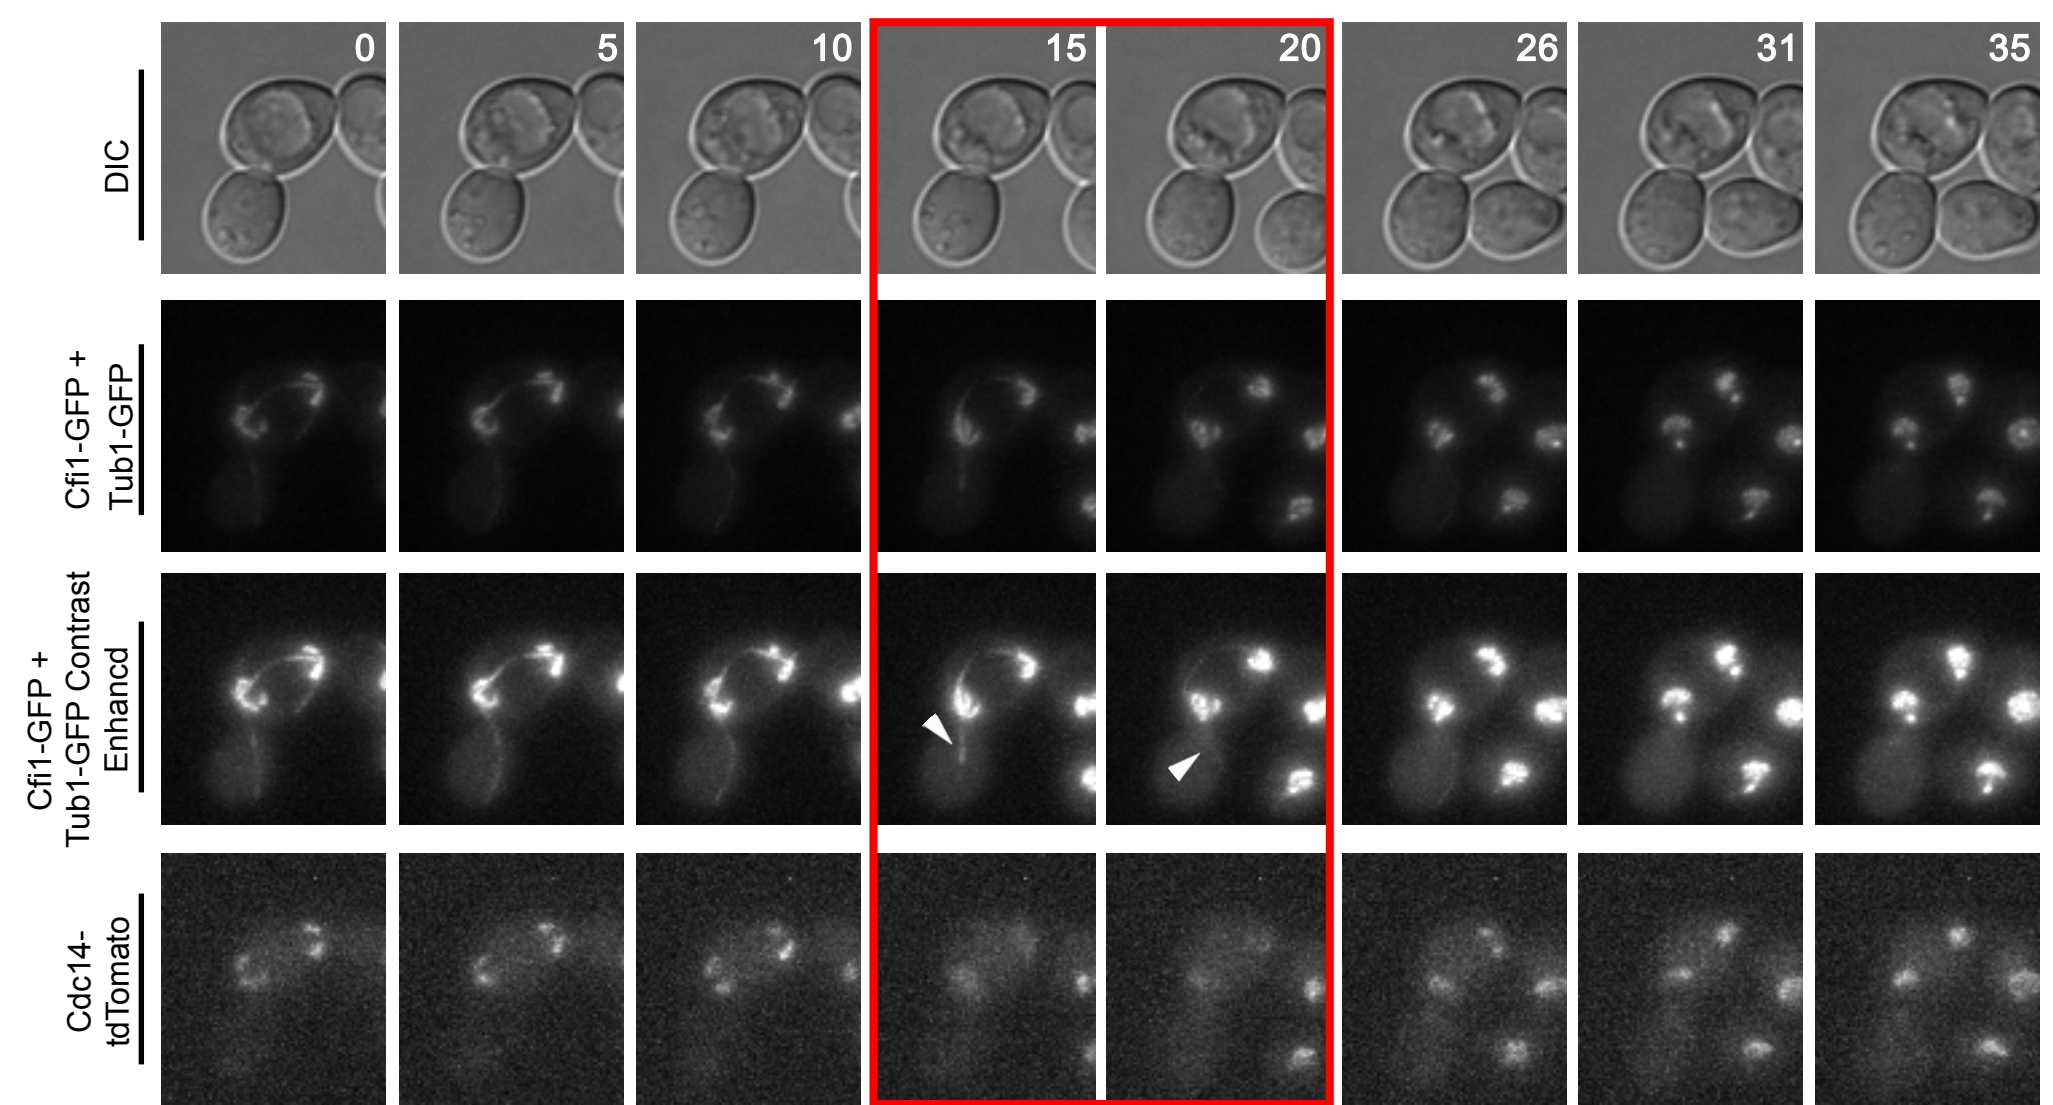

Figure 4-figure supplement 4

Supplement: supp [file elife-14036-supp-v1.zip]

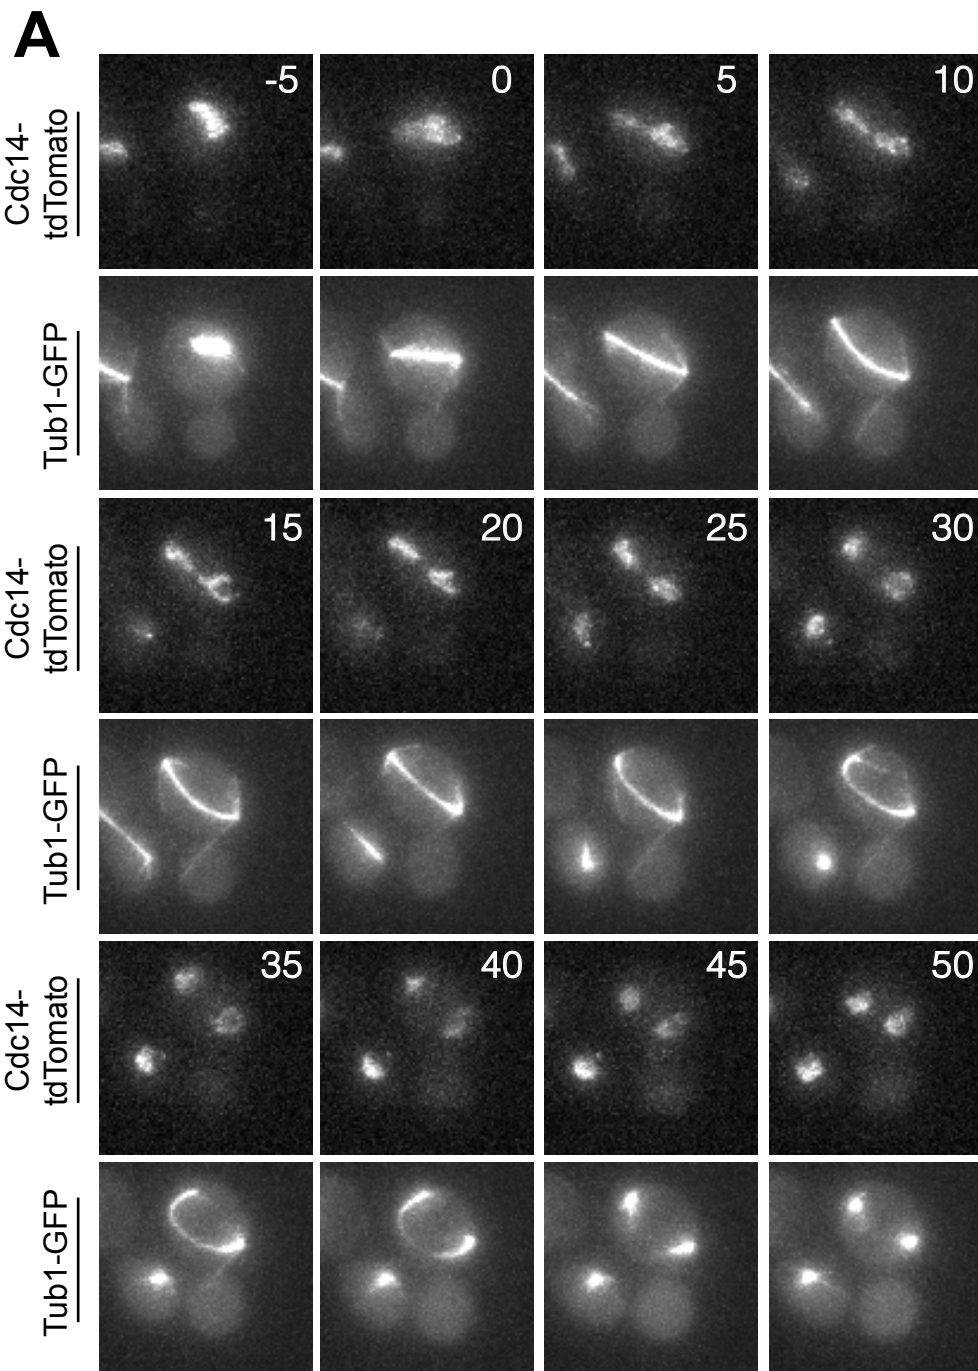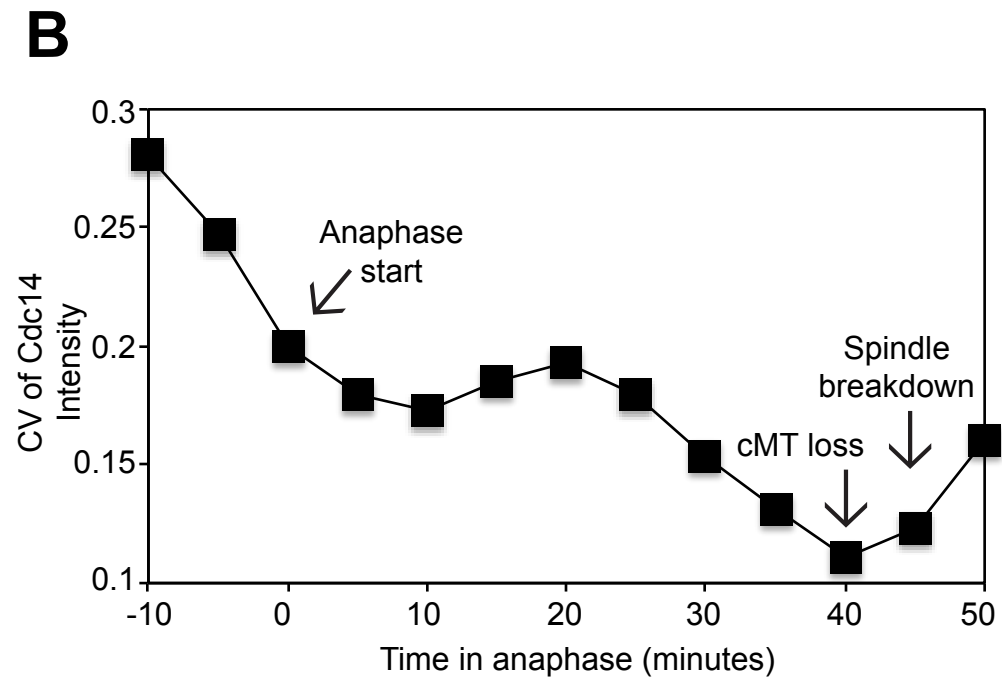

Figure 4-figure supplement 2

Supplement: supp [file elife-14036-supp-v1.zip]

**A**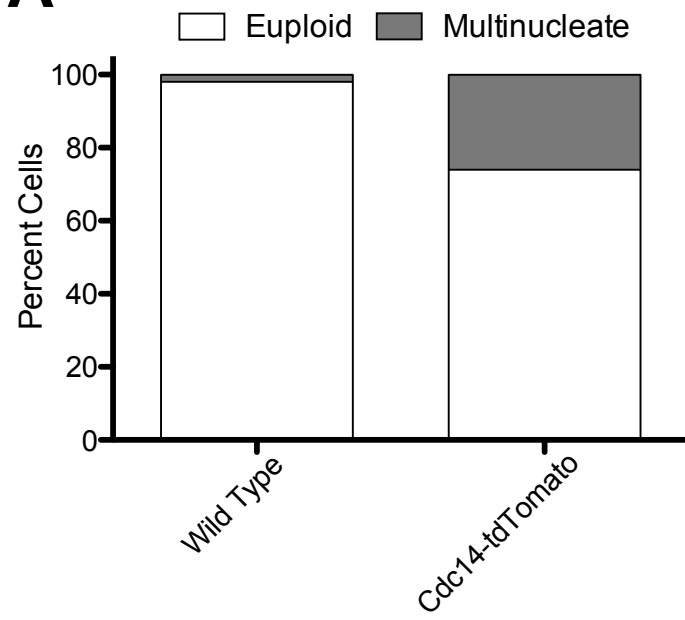**B**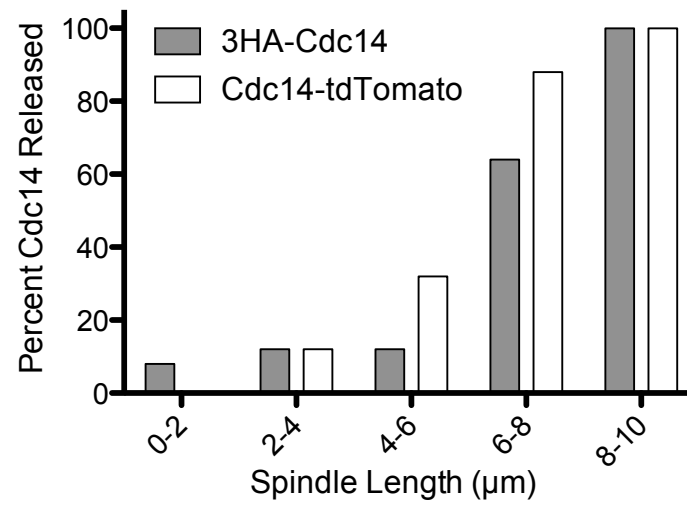

Figure 4-figure supplement 1

Supplement: supp [file elife-14036-supp-v1.zip]
